# Chronic Morphine Alters the Presynaptic Protein Profile: Identification of Novel Molecular Targets Using Proteomics and Network Analysis

Noura S. Abul-Husn<sup>1</sup>, Suresh P. Annangudi<sup>2\*</sup>, Avi Ma'ayan<sup>1</sup>, Dinah L. Ramos-Ortolaza<sup>1</sup>, Steven D. Stockton Jr.<sup>1</sup>, Ivone Gomes<sup>1</sup>, Jonathan V. Sweedler<sup>2</sup>, Lakshmi A. Devi<sup>1\*</sup>

**1** Department of Pharmacology and Systems Therapeutics, Mount Sinai School of Medicine, New York, New York, United States of America, **2** Department of Chemistry, Beckman Institute, University of Illinois at Urban-Champaign, Urbana, Illinois, United States of America

## Abstract

Opiates produce significant and persistent changes in synaptic transmission; knowledge of the proteins involved in these changes may help to understand the molecular mechanisms underlying opiate dependence. Using an integrated quantitative proteomics and systems biology approach, we explored changes in the presynaptic protein profile following a paradigm of chronic morphine administration that leads to the development of dependence. For this, we isolated presynaptic fractions from the striata of rats treated with saline or escalating doses of morphine, and analyzed the proteins in these fractions using differential isotopic labeling. We identified 30 proteins that were significantly altered by morphine and integrated them into a protein-protein interaction (PPI) network representing potential morphine-regulated protein complexes. Graph theory-based analysis of this network revealed clusters of densely connected and functionally related morphine-regulated clusters of proteins. One of the clusters contained molecular chaperones thought to be involved in regulation of neurotransmission. Within this cluster, cysteine-string protein (CSP) and the heat shock protein Hsc70 were downregulated by morphine. Interestingly, Hsp90, a heat shock protein that normally interacts with CSP and Hsc70, was upregulated by morphine. Moreover, treatment with the selective Hsp90 inhibitor, geldanamycin, decreased the somatic signs of naloxone-precipitated morphine withdrawal, suggesting that Hsp90 upregulation at the presynapse plays a role in the expression of morphine dependence. Thus, integration of proteomics, network analysis, and behavioral studies has provided a greater understanding of morphine-induced alterations in synaptic composition, and identified a potential novel therapeutic target for opiate dependence.

**Citation:** Abul-Husn NS, Annangudi SP, Ma'ayan A, Ramos-Ortolaza DL, Stockton SD Jr, et al. (2011) Chronic Morphine Alters the Presynaptic Protein Profile: Identification of Novel Molecular Targets Using Proteomics and Network Analysis. PLoS ONE 6(10): e25535. doi:10.1371/journal.pone.0025535

**Editor:** Peter Csermely, Semmelweis University, Hungary

**Received:** April 27, 2011; **Accepted:** September 6, 2011; **Published:** October 17, 2011

**Copyright:** © 2011 Abul-Husn et al. This is an open-access article distributed under the terms of the Creative Commons Attribution License, which permits unrestricted use, distribution, and reproduction in any medium, provided the original author and source are credited.

**Funding:** This work was supported by National Institutes of Health DA08863 and DA019521 to L.A.D., DA017940 and 2P30DA018310 to J.V.S., and 1P50GM071558-01A27398 to L.A.D., A.M. and D.L.R. The funders had no role in study design, data collection and analysis, decision to publish, or preparation of the manuscript.

**Competing Interests:** The authors have declared that no competing interests exist.

\* E-mail: lakshmi.devi@mssm.edu

‡ Current address: Dow AgroSciences, Indianapolis, Indiana, United States of America

## Introduction

Repeated exposure to opiates, such as morphine, produces significant and persistent changes in synaptic transmission and plasticity that may contribute to altered behaviors associated with addiction, dependence and withdrawal. While the molecular and cellular mechanisms underlying these long-lasting changes are not fully understood, substantial evidence shows that opiates play a critical role in the modulation of neurotransmitter release, particularly in the mesolimbic dopaminergic system. Chronic morphine exposure increases dopamine signaling in structures of this system [1–6], including the ventral striatum, involved in reward [7]; and the dorsal striatum, involved in craving and relapse [8]. Since reward, craving and relapse contribute to the development and maintenance of opiate addiction, it is likely that presynaptic proteins involved in the regulation of neurotransmitter release in the striatum participate in the synaptic adaptations mediating opiate addiction, dependence and withdrawal.

Given the importance of presynaptic neurotransmitter release in drug addiction, we undertook a quantitative subcellular proteomic analysis to investigate the effects of morphine on striatal presynaptic protein levels. Proteomics serves as a powerful tool to reveal changes in protein abundance in response to drug administration [9]. While many studies have described proteome changes in different brain regions [10–16] and cell culture preparations [17–18] following chronic morphine administration, few have examined morphine-induced changes in the synaptic subproteome and none have used network analysis methods to predict novel protein complexes and signaling pathways altered by morphine.

Here we used an integrated proteomics, graph theory-inspired network analysis, and behavioral approach to elucidate the presynaptic molecular events induced by repeated morphine administration. This has enabled a greater understanding of morphine-induced alterations in synaptic composition, and has allowed the identification of potential therapeutic targets for opiate dependence and addiction.

**Results**

**Protein identification and quantification**

To identify and quantify proteins regulated by morphine, presynaptic (PRE) proteins from saline- and morphine-treated rats were subjected to differential isotopic labeling and LC-MS/MS analysis. Five experiments were performed, using forward (saline = light, morphine = heavy) and reverse (saline = heavy, morphine = light) labeling (Table S1). A representative spectrum showing a decrease in NSF, a candidate protein, upon forward and reverse labeling is shown in Fig. 1A. Analysis of the MS/MS spectra led to the identification of 175 proteins (Table S2), 143 of which were quantified by determining the peak intensity of the labeled peptides (Fig. 1B). Only 30 of these proteins were robustly and consistently altered by morphine treatment; the majority of which were downregulated (Table 1). We confirmed the results from quantitative proteomic studies using Western blotting by verifying the decrease in some of these proteins from a separate set of saline- and morphine-treated animals (Fig. 2). The 30 proteins, included in a list designated as the “seed list”, belong to the following groups: vesicle trafficking (NSF, syntaxin binding protein 1); signaling ( $\beta_1$ ,  $\beta_2$ ,  $\beta_3$ , and  $\alpha_{olf}$  subunits of heterotrimeric G proteins), cytoskeleton-associated (sepin 7, tubulin beta chain 7), chaperone (heat shock cognate 71 kDa or Hsc70), and cell adhesion (contactin 1, NCAM1). Several of these proteins have established roles in synaptic plasticity, while others have been reported to be altered in different paradigms of morphine treatment [10,19,20].

**Network Analysis: Integration of Proteomics Data into a PPI Network**

To enrich the list and identify a network of proteins downregulated by morphine, we used the Genes2Networks [21] analysis (see Methods). Pairs of proteins from the seed list were connected via shared intermediates from a background dataset that was generated by combining databases of mammalian protein-protein interactions. This analysis resulted in a network containing 263 interactions among 28 proteins from the seed list, using 98 intermediates from the background dataset (Fig. 3). The clustering coefficient of this network is significantly higher (0.14) than the average clustering coefficient (0.086) computed from 100 shuffled networks created from the original topology ( $p < 0.01$ ). Using a binomial proportions test [21,22], we found 38 intermediates from the background dataset to significantly (score > 2) interact with proteins from the seed list. Of these, 21 proteins were considered highly significant (score > 3).

Since functionally related nodes are likely to interact with each other while being more separate from the rest of the network [23], we sought to identify clusters within our network, consisting of areas in the network where nodes are more densely connected to each other. This allowed us to generate predictions of other proteins likely to be modulated by morphine. We identified 3 clusters with  $k = 4$  and 10 clusters with  $k = 3$  (Figure S1). These clusters are likely to consist of protein complexes or signaling pathways with specific presynaptic functions.

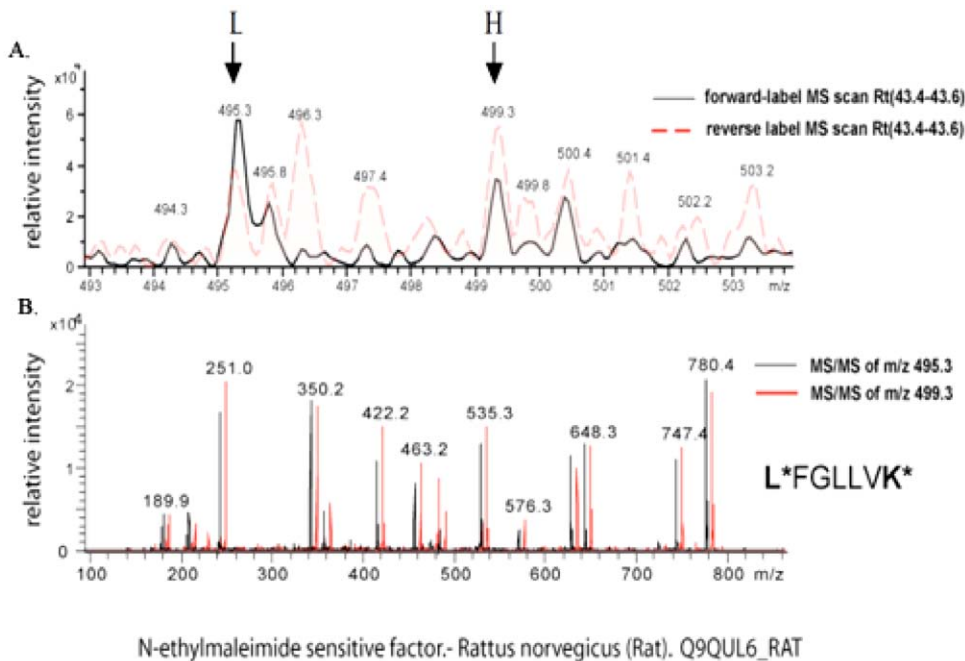

**Figure 1. Representative spectra of NSF following differential isotopic labeling and LC-MS/MS.** Protein extracts from striatal PRE fractions of saline- and morphine-treated rats were labeled either with succinic anhydride (light) or deuterated succinic anhydride (heavy) and analyzed by LC-MS/MS. (A) Combined MS scans showing the relative abundance of the peak pair with mass/charge (m/z) ratios 495.3 and 499.3 (indicated by the arrows). The morphine/saline ratio with forward labeling (saline = light, morphine = heavy; indicated in black) was ~0.55. This ratio was reversed (morphine/saline ratio ~1.6) with reverse labeling (saline = heavy (H); morphine = light (L); indicated in red). (B) Overlaid tandem MS of precursor ions m/z 495.3 (black) and m/z 499.3 (red) corresponding to the tryptic peptide L\*FGLLVK\* with labels present on N-terminal amine and C-terminal lysine (indicated by the \*). Mascot database search showed that the tryptic peptide was derived from N-ethylmaleimide sensitive factor (NSF).

doi:10.1371/journal.pone.0025535.g001

**Table 1.** Seed list of 30 proteins from the striatal PRE fraction that were altered by morphine treatment.

| Gene Name                      | Protein Name                                                                                | UniProt Acc. # |
|--------------------------------|---------------------------------------------------------------------------------------------|----------------|
| <b>Downregulated (23)</b>      |                                                                                             |                |
| <u>Vesicle Trafficking</u>     |                                                                                             |                |
| NSF                            | N-ethylmaleimide sensitive factor                                                           | Q9QUL6         |
| AP2A2                          | AP-2 complex subunit alpha-2                                                                | P18484         |
| STXBP1                         | Syntaxin-binding protein 1 (Unc-18 homolog)                                                 | P61765         |
| <u>Signaling</u>               |                                                                                             |                |
| GNAL                           | GTP-binding protein Golf alpha subunit                                                      | Q80WZ0         |
| GNB1                           | Guanine nucleotide-binding protein G(I)/G(S)/G(T) subunit beta 1                            | P54311         |
| GNB2                           | Guanine nucleotide-binding protein G(I)/G(S)/G(T) subunit beta 2                            | P54313         |
| GNB3                           | Guanine nucleotide-binding protein G(I)/G(S)/G(T) subunit beta 3                            | P52287         |
| YWHAZ                          | 14-3-3 protein zeta/delta                                                                   | P63102         |
| <u>Cytoskeleton-associated</u> |                                                                                             |                |
| SEPT3                          | G-septin gamma                                                                              | Q9R245         |
| SEPT7                          | Septin 7                                                                                    | Q9WVC0         |
| TUBB2B                         | Tubulin beta chain 15                                                                       | Q3KRE8         |
| <u>Cell Adhesion</u>           |                                                                                             |                |
| CNTN1                          | Contactin 1                                                                                 | Q63198         |
| NCAM1                          | Neural cell adhesion molecule 1, 140 kDa isoform                                            | P13596         |
| OPCML                          | Opioid-binding protein/cell adhesion molecule precursor (OBCAM)                             | P32736         |
| <u>Chaperone</u>               |                                                                                             |                |
| HSPA5                          | 78 kDa glucose-regulated protein precursor (GRP 78)                                         | P06761         |
| HSPA8                          | Heat shock cognate 71 kDa protein                                                           | P63018         |
| TCP1                           | T-complex protein 1 subunit alpha                                                           | P28480         |
| <u>Mitochondrial-related</u>   |                                                                                             |                |
| CS                             | Citrate synthase, mitochondrial precursor                                                   | Q8VHF5         |
| DLD                            | Dihydropyridyl dehydrogenase                                                                | Q6P6R2         |
| HK1                            | Chain A, Rat Brain Hexokinase Type I Complex With Glucose And Inhibitor Glucose-6-Phosphate | P05708         |
| HK2                            | Hexokinase 2                                                                                | P27881         |
| VDAC2                          | Voltage-dependent anion-selective channel protein 2                                         | P81155         |
| VDAC3                          | Voltage-dependent anion-selective channel protein 3                                         | Q9R1Z0         |
| <b>Upregulated (7)</b>         |                                                                                             |                |
| <u>Mitochondrial-related</u>   |                                                                                             |                |
| ATP5C1                         | ATP synthase gamma chain, mitochondrial                                                     | P35435         |
| ATP5B                          | ATP synthase subunit beta, mitochondrial precursor                                          | P10719         |
| COX4I1                         | Cytochrome c oxidase subunit 4 isoform 1, mitochondrial precursor                           | P10888         |
| COX5A                          | Cytochrome c oxidase subunit Va                                                             | P11240         |
| COX5B                          | Cytochrome c oxidase subunit Vb                                                             | P12075         |
| <u>Kinase</u>                  |                                                                                             |                |
| CDC42BPA                       | Serine/threonine-protein kinase MRCK alpha                                                  | O54874         |
| <u>Other</u>                   |                                                                                             |                |
| HBB                            | Beta-globin                                                                                 | Q6PDU6         |

Proteins with morphine/saline ratios of at least 0.5 standard deviations from the mean and that showed consistent changes in at least 2 of the experiments were selected. The numbers in parentheses indicate the number of proteins that were downregulated or upregulated.  
doi:10.1371/journal.pone.0025535.t001

**Validation by Western blotting analysis**

Some of the predictions generated by the cluster analysis were verified using Western blot analysis (Fig. 4). For this, we focused on two main clusters (outlined in Fig. 3): a small cluster consisting of 5 cell adhesion molecules (contactin 1 and 2, L1CAM, and neurocan or CSPG3); and the largest cluster, consisting of 36 proteins,

including a large number of signaling and vesicle trafficking proteins, such as N-type calcium channels (CACNA1B) and cysteine string protein (CSP).

In the smaller cluster, morphine administration led to a decrease in the levels of L1CAM in the PRE fraction, but not in the total homogenate (Fig. 4A). A decrease in the processed form of neurocan

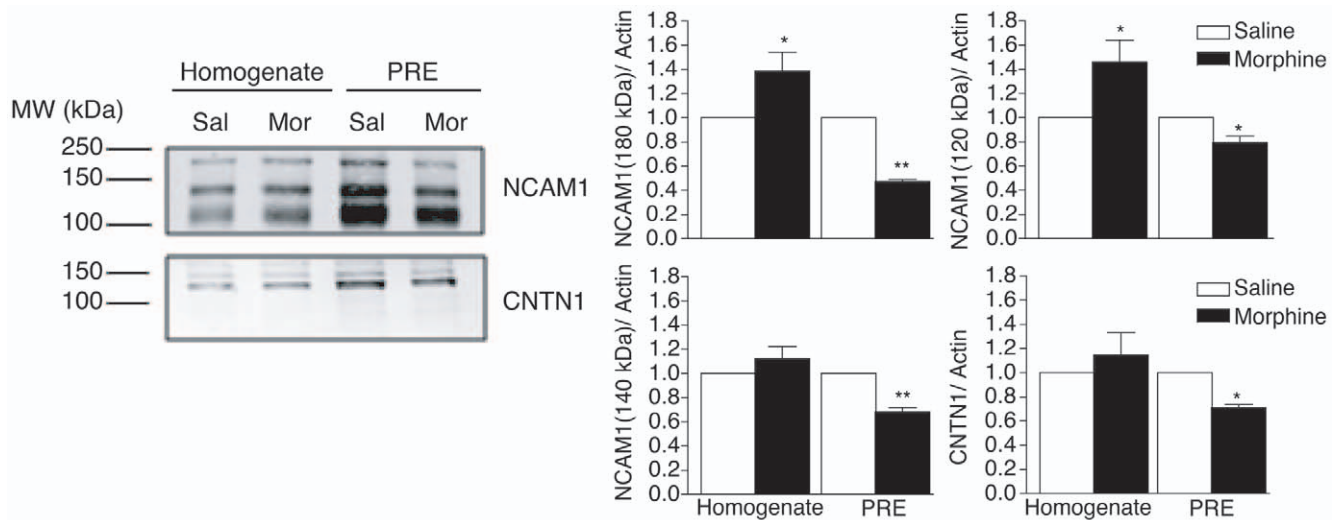

**Figure 2. Validation of results from quantitative proteomics using Western blot analysis.** The levels of NCAM and contactin 1 were decreased in the striatal PRE fraction of morphine-treated animals, but not in the total homogenate. The decrease in presynaptic NCAM was observed for the 180-, 140-, and 120-kDa isoforms of the protein. doi:10.1371/journal.pone.0025535.g002

or CSPG3 was also observed in the PRE fraction as well as in the homogenate fraction after morphine administration (Fig. 4B).

In the largest cluster, we identified CSP as a significant intermediate (with the highest score of 6.45). Western blot analysis showed a significant decrease in the levels of this protein in the PRE fraction, but not in the total homogenate, after chronic morphine administration (Fig. 4A). To determine whether chronic morphine would also alter the levels of proteins that interact with CSP, we used Western blotting to measure Hsp90 levels. In contrast to CSP, chronic morphine led to an increase in Hsp90 levels in striatal PRE fractions but not in the total homogenate (Fig. 5).

#### Naloxone-precipitated morphine withdrawal

To assess the behavioral implications of the observed increase in Hsp90 levels, we examined the effect of Hsp90 inhibition on naloxone-precipitated morphine withdrawal (Fig. 6). In morphine-treated animals, administration of the selective Hsp90 inhibitor, geldanamycin, led to a dose-dependent decrease in somatic signs of withdrawal (Fig. 6B, Table 2). No significant effects were observed in animals chronically exposed to saline in the absence or presence of geldanamycin (Fig. 6A). After behavioral testing we used an ELISA assay to determine the levels of Hsp90 in brain homogenates and PRE fractions under different treatment conditions. As expected we observed an increase in Hsp90 levels in the PRE fraction but not in the total brain homogenate of animals treated chronically with morphine (Fig. 6C & D). This increase in Hsp90 levels in the PRE fraction was also observed following naloxone administration, although a decrease was seen in brain homogenates (Fig. 6C & D). Interestingly, the Hsp90 inhibitor, geldanamycin, significantly increased the levels of Hsp90 in brain homogenates but not in the PRE fraction of animals treated chronically with morphine (Fig. 6C & D). Taken together these results suggest that Hsp90 may play a role in dependence-associated behaviors.

#### Discussion

In this study, we undertook a quantitative subcellular proteomic analysis to study the effects of morphine on striatal presynaptic protein levels. We used a five-day paradigm of chronic intermittent escalating morphine administration that results in

the development of significant opiate dependence [24], which is considered to be due to neuroadaptations in the mesolimbic system of the brain. This led to the identification of many proteins that may play a role in the synaptic plasticity events underlying the long-lasting and persistent effects of morphine in the brain.

#### Vesicle trafficking

Our analysis showed morphine-induced downregulation of most of the proteins identified. Some of these are involved in various steps of synaptic vesicle trafficking, including vesicle priming (NSF), docking (syntaxin-binding protein 1 or Unc-18 homolog), and endocytosis (AP-2 alpha2), supporting previous reports of downregulation of SNARE complex formation [19,20] and NSF upon morphine treatment [10]. Moreover, these results provide additional information on the proteins involved in the synaptic plasticity events thought to underlie addiction [25].

#### Cytoskeleton-associated and cell adhesion

Our proteomics data showed morphine-induced decreases in several cytoskeleton-associated and cell adhesion molecules, including tubulin beta chain 15, septin 3 and 7, contactin 1, NCAM1, and opioid-binding cell adhesion molecule (OPCML or OBCAM) (Table 1). Western blot analysis of contactin 1 and NCAM 1 confirmed these results and showed that the decrease was specific to the PRE fraction and not to total homogenate, suggesting a redistribution of these proteins away from the presynaptic nerve terminal, rather than a global decrease in their expression levels. This is consistent with previous reports showing that continuous morphine treatment decreases NCAM1 levels in a synaptic membrane fraction<sup>10</sup>. Taken together, these results suggest a morphine-induced regulation of synapse architecture, which could play an important role in long-term synaptic plasticity. It is likely that other proteins at the presynapse are similarly translocated upon morphine treatment, although the mechanisms underlying this phenomenon remain unknown.

Similar results were observed for proteins predicted by our network analysis to be modulated by morphine. For instance, a decrease in processed neurocan was mostly seen in the PRE fraction. This, taken with the finding that decreases in L1CAM

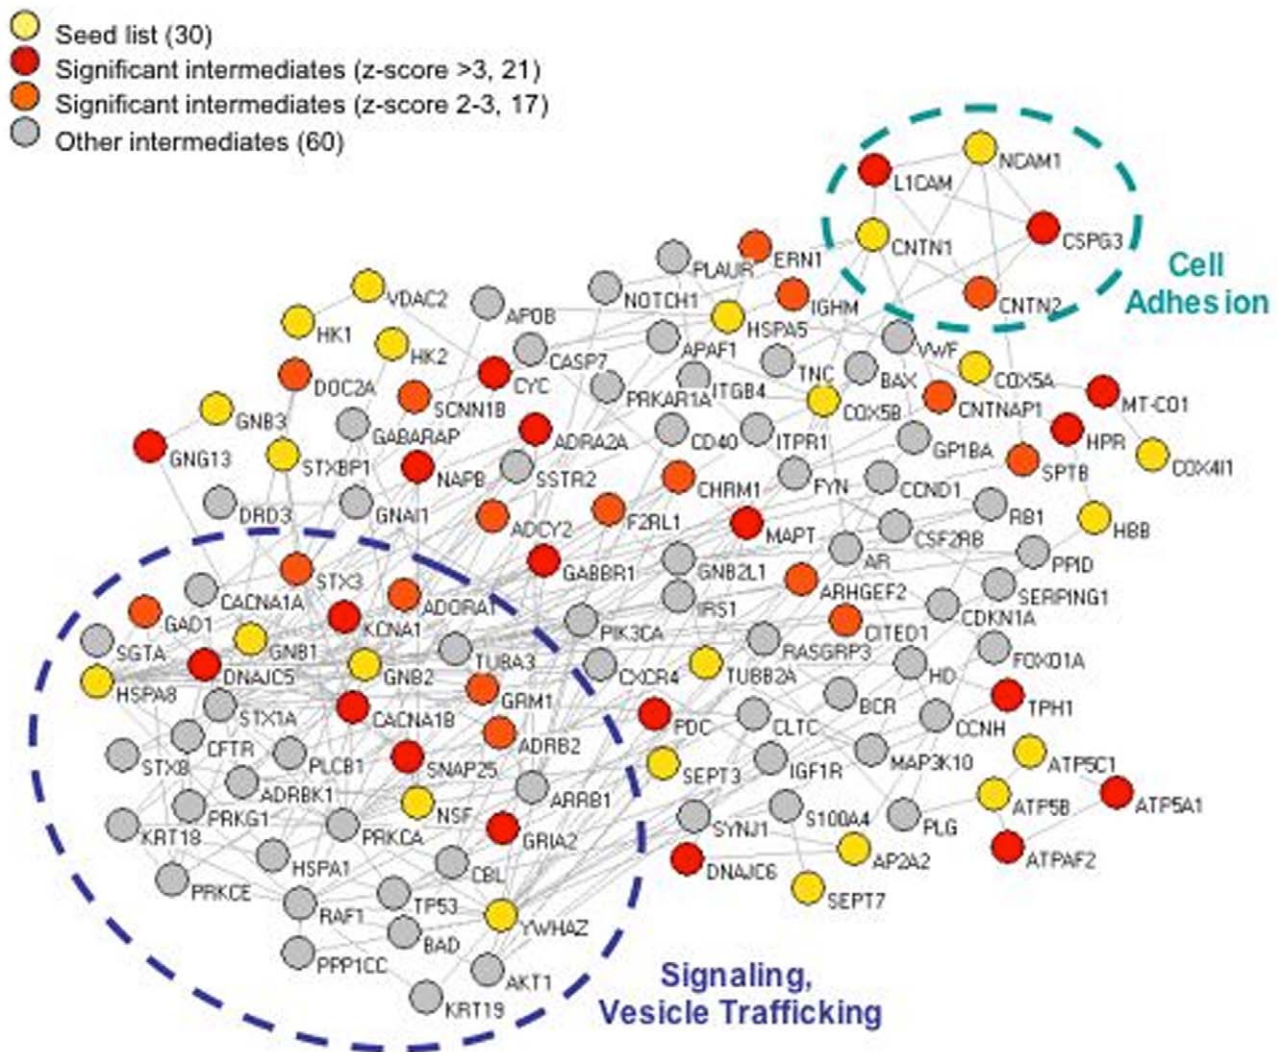

**Figure 3. Network representation of proteins altered by morphine treatment.** Proteins from the seed list (yellow) were connected via intermediates from the background dataset. Significant intermediates are shown in red (score>3) or orange (score between 2–3). The two clusters that were used to make predictions of morphine-regulated proteins are outlined. doi:10.1371/journal.pone.0025535.g003

levels were seen only in PRE fraction and not in homogenate, further supports the novel concept of regulation of protein levels by redistribution of proteins from PRE to extra-synaptic areas (as opposed to changes in gene expression).

### Signaling

Previously, it was shown that long-term exposure to morphine leads to a decrease in the levels of several G protein subunits ( $\alpha_{12}$ ,  $\alpha_{13}$ ,  $\beta_1$ ,  $\beta_2$ ) in human neuroblastoma SH-SY5Y cells stably expressing the  $\mu$  opioid receptor [26]. Our results show that chronic morphine treatment results in the downregulation of  $\beta_1$ ,  $\beta_2$ ,  $\beta_3$ , and  $\alpha_{olf}$  subunits of heterotrimeric G proteins, further supporting the modulation of signaling proteins by morphine. Interestingly, others have shown that this morphine-induced downregulation of G $\beta$  seems to correlate with sensitization of adenylyl cyclase, a hallmark of opiate dependence [26].

### Chaperone

Another group of proteins, shown by our proteomics analysis to be downregulated by chronic morphine administration, includes

molecular chaperones such as GRP 78, (Hsc70), and TCP1. Hsc70, a constitutively expressed protein, is a member of the 70 kDa heat shock protein family (Hsp70). It is enriched in the mammalian nervous system, particularly at synapses, where it plays a role in the folding of denatured proteins [27,28]. It may also have a neuroprotective role that preserves synaptic function [28]. This protein also interacts with CSP, a member of the DnaJ (or Hsp40) protein family found on synaptic vesicles and clathrin coated vesicles in neurons [29]. Both proteins assemble into an enzymatically active chaperone complex that associates with G $\beta$ , increasing its inhibition of N-type calcium channels [30–32], and this may be necessary for presynaptic neurotransmitter release [33]. This complex may also facilitate protein interactions at different stages of the vesicle trafficking cycle, regulating processes at all stages of exocytosis, including neurotransmitter synthesis and vesicle filling, docking, calcium entry, and vesicle fusion [34]. Our results showed a decrease in both Hsc70 (data not shown) and CSP in the PRE fraction upon morphine treatment, suggesting that these two proteins may have a critical effect on presynaptic function.

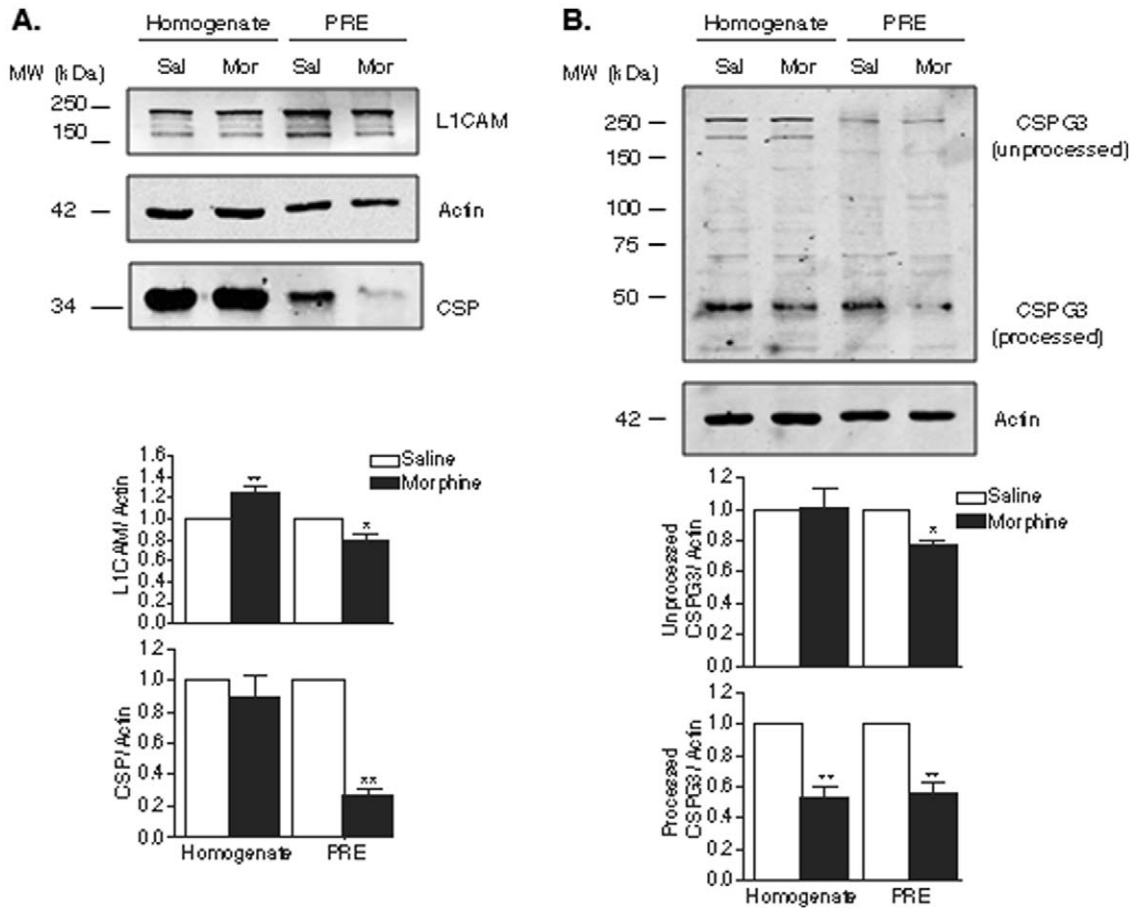

**Figure 4. Validation of network analysis predictions.** Using graph theory-based methods, L1CAM, neurocan (CSPG3), and CSP were predicted to be decreased at the presynapse by morphine treatment. Western blot analysis showed a decrease in (A) L1CAM, CSP, and (B) a lower molecular weight form of neurocan in the PRE fraction after chronic morphine administration. Protein levels were normalized to actin. A representative figure (out of 6 blots) is shown; the graph with statistical data is from multiple determinations \*\*p<0.01 compared to saline treated (n=6). doi:10.1371/journal.pone.0025535.g004

Having found significant morphine-induced changes in the levels of CSP and Hsc70, we sought to determine whether chronic morphine administration would also affect the levels of Hsp90, which is known to interact with these proteins under normal conditions [34]. Our results showed an increase in presynaptic Hsp90 levels after chronic morphine administration, suggesting a morphine-induced dissociation of Hsp90 from the interacting complex (i.e. from CSP and Hsc70) and recruitment to the presynaptic terminal that may result in its association with other yet-unidentified proteins at the presynapse. Additionally these studies suggest that although some proteins may not be detected by quantitative subcellular proteomic analysis, their presence can be deduced through the identification of interacting proteins by a combination of network and cluster analysis.

#### Naloxone-precipitated morphine withdrawal

To further assess the functional implications of the observed increase in Hsp90 levels, we used a morphine withdrawal paradigm to determine whether this increase plays a role in morphine dependence. Our results showed that inhibition of Hsp90 by geldanamycin dose-dependently decreases somatic signs of morphine withdrawal, suggesting that Hsp90 may play an important role in dependence-associated behaviors and that its inhibition may alleviate symptoms of withdrawal in opiate-dependent subjects. Moreover, Hsp90 inhibitors may represent

potential therapeutics to prevent the cellular adaptations to chronic morphine administration, since it was recently shown that inhibition of Hsp90 partially inhibits the adenylyl cyclase superactivation observed after chronic morphine administration [35]. Taken together, these studies suggest a provocative role for molecular chaperones in mediating presynaptic events that may underlie some of the long-lasting effects of morphine. In fact, there is evidence to suggest that Hsp90 may play an important role in neurotransmission [33,36], suggesting that the changes observed after chronic morphine administration may be related to the role of Hsp90 in neurotransmission and not necessarily a general response to stress.

Morphine and other addictive drugs produce significant and persistent adaptations at the synaptic level that may underlie their long-lasting addictive potential [25]. We previously showed the powerful potential that an integrated proteomics and computational approach has to make biologically relevant predictions that can be tested experimentally [22]. Here we used this approach to gain a better understanding of the presynaptic proteins, signaling pathways, and complexes that are regulated by morphine and to identify potential targets for treatment of opiate dependence and addiction (Figure S2). One of the major substrates of the molecular and cellular mechanisms of opiate addiction is the striatum, which has been implicated in reward, habit learning, craving and relapse. This information on chronic morphine-induced changes in striatal

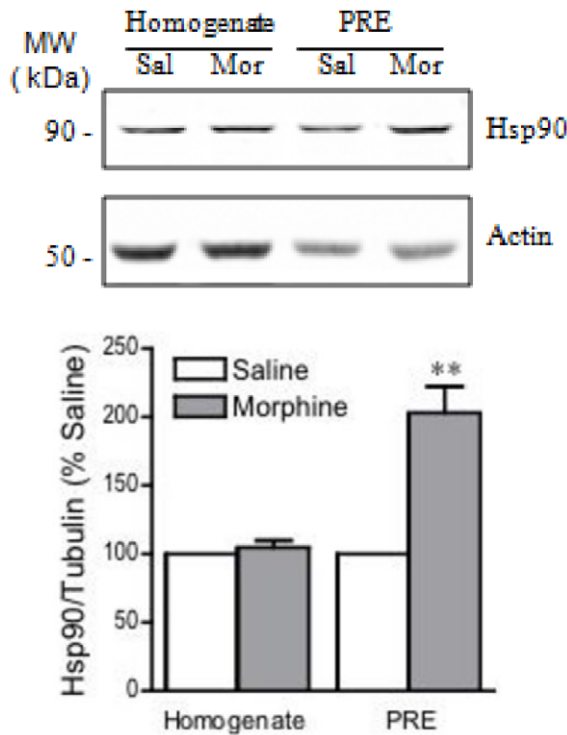

**Figure 5. Hsp90 levels after chronic morphine administration.** Western blot analysis showed an increase in the levels of Hsp90 in the PRE fraction after chronic morphine administration. No changes were observed in total homogenates suggesting redistribution of the protein rather than increases in gene expression changes. Protein levels were normalized to actin. \*\* $p < 0.01$  compared to saline treated ( $n = 6$ ). A representative blot of 6 is shown. doi:10.1371/journal.pone.0025535.g005

presynaptic proteins constitutes an important first step to guide future studies on the roles of these proteins in addiction. Furthermore, this study demonstrates that such an approach using proteomic techniques in combination with computational graph theory analysis, allows a unique and more complete understanding of neurobiological networks at the presynapse and their regulation.

**Materials and Methods**

**Animals and Drug Treatment**

Protocols involving animals were conducted in accordance with the recommendations set forth in the *Guide for the Care and Use of Laboratory Animals* by the National Institutes of Health, and were approved by the Institutional Animal Care and Use Committee at Mount Sinai School of Medicine (Protocol Number 02-0805). Adult male Sprague-Dawley rats (200–250 g) or C57BL/6 mice (25–30 g) were maintained on a 12-h light/dark cycle and provided with food and water *ad libitum*. Animals were allowed to acclimatize to their environment for a week prior to drug administration. Morphine sulfate (Sigma, St. Louis, MO, USA) was prepared in 0.9% sterile isotonic saline. Animals were injected intraperitoneally (i.p.) with saline or morphine for 5 days. In the latter case, morphine was injected in escalating doses (5, 10, 15, 20, 25, 30, 35, 40 and 50 mg/kg) every 12 h. This intermittent, escalating dose paradigm of morphine administration results in the development of morphine dependence and withdrawal, and is referred to as chronic morphine administration in the field. Animals were sacrificed 2 h after the last injection.

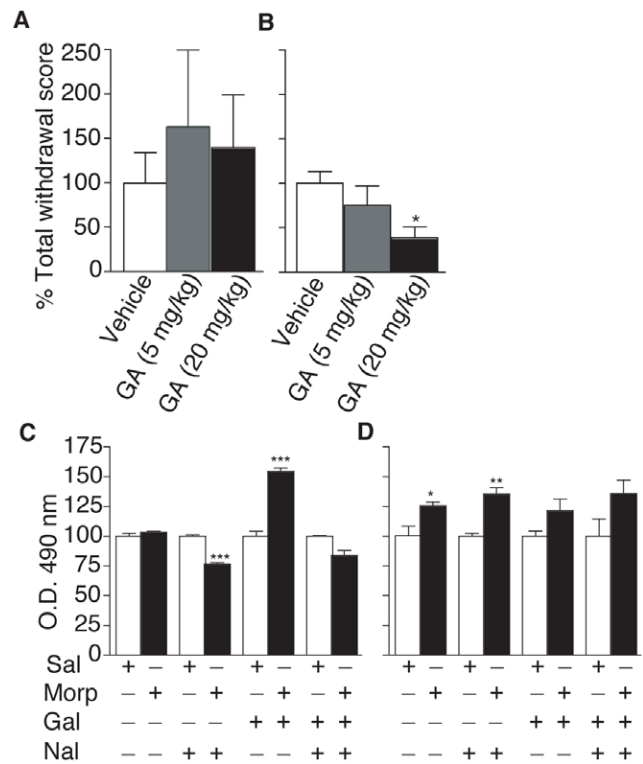

**Figure 6. The effect of geldanamycin on naloxone-precipitated morphine withdrawal.** (A & B) Mice treated chronically with saline (A) or morphine (B) were injected with either geldanamycin (GA; 5 or 20 mg/kg i.p.) or vehicle (20% DMSO in 0.9% saline) 2 h after the last injection, followed by naloxone (1 mg/kg s.c.) and withdrawal was evaluated for a period of 30 min as described in Methods. Geldanamycin (20 mg/kg) attenuates signs of morphine withdrawal. (C & D) Following behavioral analysis animals were sacrificed and Hsp90 levels were detected by ELISA in brain homogenates (C) and PRE fractions (D) as described in Methods. Data represents Mean  $\pm$  SEM  $n = 4-12$ /group. doi:10.1371/journal.pone.0025535.g006

**Subcellular Fractionation**

After chronic morphine treatment, animals were sacrificed by decapitation and the brains rapidly removed. Isolation of a presynaptic (PRE) fraction was performed as previously described [22]. The striata from 3 saline- or morphine-treated rats were combined and homogenized in 3 ml of 0.32 M sucrose,

**Table 2. The effect of geldanamycin on naloxone-precipitated morphine withdrawal.**

| Withdrawal Signs | Vehicle (n = 12) | GA (5 mg/kg) (n = 4) | GA (20 mg/kg) (n = 7) |
|------------------|------------------|----------------------|-----------------------|
| Rearing          | 55.33 $\pm$ 7.87 | 32.86 $\pm$ 13.45    | 22.33 $\pm$ 9.38*     |
| Jumping          | 37.18 $\pm$ 6.49 | 19.5 $\pm$ 14.66     | 2.86 $\pm$ 1.72**     |
| Forepaw Tremors  | 54.42 $\pm$ 9.43 | 58.00 $\pm$ 19.84    | 21.23 $\pm$ 7.56      |
| Teeth chattering | 5.17 $\pm$ 0.45  | 2.75 $\pm$ 0.63*     | 1.57 $\pm$ 0.48***    |
| Ptosis           | 4.42 $\pm$ 0.31  | 2.25 $\pm$ 0.75*     | 3.14 $\pm$ 0.51       |
| Diarrhea         | 2.58 $\pm$ 0.52  | 0.25 $\pm$ 0.25*     | 0.42 $\pm$ 0.30**     |

\* $p < 0.05$ , \*\* $p < 0.01$ , \*\*\* $p < 0.001$  Vehicle vs GA. doi:10.1371/journal.pone.0025535.t002

0.1 mM CaCl<sub>2</sub>, with 30 µl each of protease and phosphatase inhibitor cocktails (Sigma, St. Louis, MO) at 4°C. All of the following fractionation steps were carried out at 4°C unless otherwise specified. The homogenate was brought to a final concentration of 1.25 M sucrose by the addition of 2 M sucrose (12 ml) and 0.1 mM CaCl<sub>2</sub> (5 ml). The homogenate was then placed in a 40 ml ultracentrifuge tube and overlaid with 10 ml 1 M sucrose, 0.1 mM CaCl<sub>2</sub>. The gradients were centrifuged at 100,000 g for 3 h. The synaptosomal fraction (4–5 ml) was collected at the 1.25 M/1 M interface. To obtain synaptic membranes, the synaptosomal fraction was brought to a volume of 35 ml with 20 mM Tris-Cl pH 6, 0.1 mM CaCl<sub>2</sub>, containing 1% Triton X-100 (TX-100) and 350 µl each of protease and phosphatase inhibitor cocktails, mixed for 20 min, and centrifuged at 40,000 g for 20 min. The pellet containing the isolated synaptic membranes was collected. To separate a presynaptic fraction from the post-synaptic density (PSD), the pellet was resuspended in 20 ml of 20 mM Tris-Cl pH 8, 1% TX-100, 0.1 mM CaCl<sub>2</sub>. The mixture was again mixed for 20 min, and centrifuged at 40,000 g for 20 min. The supernatant was removed and concentrated to 1 ml using an Amicon Ultra-15 filter (5,000 MW cut-off, Millipore, Bedford, MA). The concentrate was precipitated with 9 ml of acetone by incubation at –20°C for 12 h, and centrifugation at 15,000 g for 30 min. The resulting pellet, containing the PRE fraction, was stored at –80°C until use. We have previously shown that the PRE fraction, isolated in this manner, is enriched in presynaptic proteins and excludes proteins that are enriched in the PSD fraction [22].

### Tryptic Digestion and Isotopic Labeling

Labeling experiments were performed as described elsewhere [19,20], using three independent pools of PRE fractions isolated from three rats each. The pellet containing the PRE fraction was resuspended and solubilized in 0.1% SDS to a final concentration of 1 µg/µL. 30 µg of protein extract were reduced using a 1,4-dithiothreitol (DTT) solution (200 mM DTT in 100 mM NH<sub>4</sub>HCO<sub>3</sub>, pH 8–10) at 40°C for 1 h. The reduced proteins were alkylated using 1 M iodoacetamide (IAM) in 100 mM NH<sub>4</sub>HCO<sub>3</sub> for 40 min at room temperature (RT) in the dark. Unreacted IAM was quenched with the DTT solution for 1 h. The alkylated proteins were precipitated with cold acetone overnight, and the precipitate was pelleted by centrifugation (15000 rpm, 40 min, 4°C), then dissolved in digestion buffer (50 mM NH<sub>4</sub>HCO<sub>3</sub>, 1 M urea, pH 8–10), with 0.1 µg of trypsin (Sigma) at 40°C for 3 h. The pH of the tryptic digests was then adjusted to 9–10 with 1 M NaOH. For quantification, covalent modification of the tryptic peptides was performed by adding 2 µL of light (2 M succinic anhydride in DMSO) or heavy (2 M succinic [<sup>2</sup>H<sub>4</sub>] anhydride in DMSO) label [37]. The samples were vortexed and centrifuged, then incubated for 15 min at RT. The pH of the solutions was readjusted to 9–10. The labeling procedure was repeated 4 times with subsequent adjustment of pH. Remaining unreacted isotopic labels were quenched using 10 µL of 2.5 M glycine for 1 h at RT. The light and heavy isotope-labeled samples were then combined and desalted using a PepClean<sup>TM</sup> C18 spin column (Pierce), as per the manufacturer's protocol, and peptides eluted using 70% aqueous acetonitrile solution. The solvent in the eluate was removed using a vacuum centrifuge, and the residue containing the peptides was reconstituted in 20 µL of solvent A (5% aqueous acetonitrile with 0.1% FA and 0.01% TFA in water). 10 µL aliquots from each sample were used for LC-MS/MS analysis as described below.

### Mass Spectrometry

Peptide separation and MS analysis were performed using a capLC<sup>TM</sup> (Micromass, UK) system coupled to an HCTUltra-PTM Discovery system ion-trap mass spectrometer (Bruker Daltonics, Billerica, MA, USA) equipped with an electrospray ionization source. The sample was injected using a manual injector (Valco Instruments Co, Inc., TX, USA) and loaded onto a trap column (PepMap<sup>TM</sup>, C18, 5 µm, 100 Å, LC Packings) using solvent A and washed for 5 min. The trapped peptides were then eluted in the reverse direction onto a reverse phased capillary column (LC Packings<sup>TM</sup> 300 µm i.d.×15 cm, C18 PepMap100, 100 Å) using a solvent gradient at a flow rate of 2 µL/min. The solvent gradient was generated using solvent A and solvent B (95% aqueous acetonitrile with 0.1% FA and 0.01% TFA in water). The 70 min gradient run for LC separation included 3 steps: 5–80% solvent B in 15–55 min (linear); 80% solvent B for 55–60 min (isocratic); 80–5% solvent B in 60–65 min (linear). MS data acquisition and the subsequent MS/MS of selected peaks were performed in a data-dependent manner using the Esquire software (Bruker Daltonics). For each MS scan, three peptides were selected to be fragmented, for 300–500 ms, based on their charge (preferably +2) and intensity. Dynamic exclusion of previously fragmented precursor ions was set to 2 spectra for a period of 60 s. The MS and MS/MS scan were performed in the range of m/z 300–1500 and 50–2000 respectively.

### Protein Identification and Quantification

The data were processed using the Data analysis software (Bruker Daltonics). MS data obtained between 20 and 45 min of the LC run was searched for compounds using an automated search option. The short-listed compounds with their respective MS/MS scans were directly exported to Biotoools software (Bruker) for database searching using an in-house Mascot database search engine (Matrix Science). The mass tolerance of this study was set at 0.1% for MS and 0.5 Da for MS/MS. The search parameters included fixed modifications for cysteine (carbamidomethyl) and variable modifications for methionine (Met-oxidized), succinic anhydride or succinic [<sup>2</sup>H<sub>4</sub>] anhydride modified lysine and N-terminal amines. With Mascot, every tandem mass spectrum was assigned a list of matching database peptide sequences accompanied by a score representing the quality of each sequence identification. A Mascot score of 50 is commonly used as a cut-off for 95% confident identification. Only proteins identified with a Mascot score ≥60 for every peptide were considered for further analysis (for further experimental details on these measurements see references [37,38]). For quantification, peak pairs with mass differences of 2, 4 or 8 Da, a retention time window of 30 s, and a signal-to-noise intensity >10 were listed using Data Analysis software, along with their peak intensity ratios and retention times. The morphine/saline ratio for each protein reflects the average of ratios obtained for each of the isotopically labeled tryptic peptides identified. During data acquisition only one of the labeled peptides was selected for fragmentation. In several cases, peptide peak pairs were manually identified and quantified.

### Integration of Proteomics Data into a PPI Network

The proteins altered by morphine treatment were placed in the context of signaling pathways and protein complexes using the software tool Genes2Networks (<http://actin.pharm.mssm.edu/genes2networks>) [21]. Genes2Networks integrates the contents of 10 mammalian binary interaction network datasets: BIND [39], DIP [40,41], HPRD [42], IntAct [43], Ma'ayan [44], MINT [45], Stelzl [46], Vidal [47], PDZBase [48], and PPID [49]. To this, we added our own presynaptic PPI network dataset, [PLoS ONE | www.plosone.org](http://amp.</a></p>
</div>
<div data-bbox=)



pharm.mssm.edu/presynaptome [22]. The consolidated background dataset before filtering contained 11,053 nodes and 44,985 links, with nodes representing the proteins, and links representing direct protein-protein interactions. To decrease the level of false positives resulting from high-throughput experiments, the dataset was filtered to exclude interactions originating from articles that provided five or more interactions. The final, filtered background dataset contained 2,788 nodes and 19,695 links. The proteins we identified as altered in the presynapse were connected using a maximum of two intermediates from the background dataset (path length of two nodes and three links). The resultant network was visualized using the signaling network analysis and visualization integrator (SNAVI) software package [50].

### Network Analysis – Significant Intermediates and Clustering

A binomial proportions test was used to evaluate the significance of interactions between proteins from the background dataset with the seed list. The z-score (referred to as “score”) for each protein from the background dataset was computed as described previously [21,22]. A higher score for a protein would indicate that the number of its interactions with proteins from our experimentally determined seed list is significantly enriched compared with the number of its interactions with other proteins from the background network. In this analysis, we considered proteins with a score between 2–3 to be significant interactors with proteins from the seed list, and proteins with a score between >3 to be highly significant. Cfinder (<http://www.cfinder.org/>) [51] was used to locate and visualize clusters in the PPI network containing the proteins altered by morphine treatment and the intermediates connecting them. CFinder uses the clique percolation method to locate *k*-clique percolation clusters in the network [52]. A *k*-clique is defined as a complete, or fully connected, subgraph on *k* nodes within the cluster. Two *k*-cliques are considered adjacent if they share *k*-1 nodes, i.e. if they differ only in a single node. A *k*-clique percolation cluster consists of a maximal *k*-clique-connected subgraph, i.e. the union of all *k*-cliques that can be reached via chains of adjacent *k*-cliques, and the links in these cliques. This method allows the identification of overlapping clusters, such that a single node can belong to more than one cluster.

### Western Blotting

10 µg of protein from each fraction were resolved in 7.5% SDS-PAGE and analyzed by Western blots with the following antibodies: CSP (1:3000, Stressgen, Victoria, BC), α-contactin (1:1000, gift from J Salzer, NYU), neurocan (1:2000, gift from R. Margolis, NYU) L1CAM (1:5,000, gift from D. Felsenfeld, MSSM), NCAM1 (gift from G. Phillips, MSSM), Hsp90 (1:10,000, Stressgen), Hsp70 (1:10,000, Stressgen), actin (1:10,000, Sigma).

### Naloxone-Precipitated Morphine Withdrawal

C57BL/6 adult male mice (20–25 g) were injected with chronic morphine or saline (i.p.) as described above (n = 4–12 animals per

group). Two hours after the last injection, animals were injected with geldanamycin (5 or 20 mg/kg i.p.) or vehicle (20% DMSO in 0.9% saline), followed by naloxone (1 mg/kg s.c.). After naloxone injection, six somatic signs of withdrawal were evaluated for a period of 30 min. Three signs (jumping, rearing and forepaw tremors) were counted and three signs (teeth chattering, ptosis and diarrhea) received a score of 1 for every 5-min interval in which it was present. After behavioral tests were complete, animals were sacrificed, brains were extracted and used to prepare homogenate and PRE fractions as described above. Hsp90 levels in these fractions were determined by ELISA as described previously [53] using 10 µg protein, 1:2000 dilution of Hsp90 antibody and 1:2000 dilution of HRP conjugated anti-rabbit antibody.

### Supporting Information

**Figure S1** Clusters identified in the network of proteins altered by morphine treatment. Clusters were identified and visualized using CFinder, which uses the clique percolation method to identify overlapping clusters. A total of 13 overlapping clusters were identified in the network: 3 clusters with *k* = 4 and 10 clusters with *k* = 3.

(TIF)

**Figure S2** A flow chart summarizing the process of proteomic data analysis and computational predictions. Simplified schematic of the approaches used to identify morphine-regulated presynaptic proteins by quantitative proteomics, and to map potential presynaptic signaling pathways and protein complexes by graph theory. These were then used to predict novel morphine-regulated proteins. F = forward labeling, R = reverse labeling. The number of proteins quantified is indicated in parentheses.

(TIF)

**Table S1** Each sample represents a pool of 3 striatal PRE fractions from saline- and morphine-treated rats. In total, 175 unique proteins were identified, and 143 of these were quantified. Proteins identified were those with Mascot scores ≥60.

(DOC)

**Table S2** Analysis of MS/MS spectra led to the identification of 175 proteins, 143 of which were quantified by determining the peak intensity of the labeled peptides. Only 30 of these proteins were robustly and consistently altered by morphine treatment.

(DOC)

### Acknowledgments

We thank I. Bushlin for critical reading of the manuscript and helpful suggestions.

### Author Contributions

Conceived and designed the experiments: NA AM JS LD. Performed the experiments: NA SA DR IG. Analyzed the data: NA SA DR SS IG. Contributed reagents/materials/analysis tools: AM. Wrote the paper: NA SS DR LD.

### References

- Di Chiara G, Imperato A (1988) Opposite effects of mu and kappa opiate agonists on dopamine release in the nucleus accumbens and in the dorsal caudate of freely moving rats. *J Pharmacol Exp Ther* 244: 1067–1080.
- Schrater PR, Russo AC, Stanton TL, Newman JR, Rodriguez LM, et al. (1993) Changes in striatal dopamine metabolism during the development of morphine physical dependence in rats: observations using in vivo microdialysis. *Life Sci* 52: 1535–1545.
- Pontieri FE, Tanda G, Di Chiara G (1995) Intravenous cocaine, morphine, and amphetamine preferentially increase extracellular dopamine in the “shell” as compared with the “core” of the rat nucleus accumbens. *Proc Natl Acad Sci USA* 92: 12304–12308.
- Shoab M, Spanagel R, Stohr T, Shippenberg TS (1995) Strain differences in the rewarding and dopamine-releasing effects of morphine in rats. *Psychopharmacology (Berl)* 117: 240–247.

5. Murphy NP, Lam HA, Maidment NT (2001) A comparison of morphine-induced locomotor activity and mesolimbic dopamine release in C57BL/6, 129/Sv and DBA/2 mice. *J Neurochem* 79: 626–635.
6. Fadda P, Scherma M, Fresu A, Collu M, Fratta W (2005) Dopamine and serotonin release in dorsal striatum and nucleus accumbens is differentially modulated by morphine in DBA/2J and C57BL/6J mice. *Synapse* 56: 29–38.
7. Wise RA (1987) The role of reward pathways in the development of drug dependence. *Pharmacol Ther* 35: 227–263.
8. Volkow ND, Wang GJ, Telang F, Fowler JS, Logan J, et al. (2006) Cocaine cues and dopamine in dorsal striatum: mechanism of craving in cocaine addiction. *J Neurosci* 26: 6583–6588.
9. Abul-Husn NS, Devi LA (2006) Neuroproteomics of the synapse and drug addiction. *J Pharmacol Exp Ther* 318: 3303–3315.
10. Prokai L, Zharikova AD, Stevens SM, Jr. (2005) Effect of chronic morphine exposure on the synaptic plasma-membrane subproteome of rats: a quantitative protein profiling study based on isotope-coded affinity tags and liquid chromatography/mass spectrometry. *J Mass Spectrom* 40: 169–175.
11. Bierzynska-Krzysik A, Pradeep John JP, Silberring J, Kotlinska J, Dylag T, et al. (2006) Proteomic analysis of rat cerebral cortex, hippocampus and striatum after exposure to morphine. *Int J Mol Med* 2006 18: 775–784.
12. Bierzynska-Krzysik A, Bonar E, Drabik A, Noga M, Suder P, et al. (2006) Rat brain proteome in morphine dependence. *Neurochem Int* 49: 401–406.
13. Li KW, Jimenez CR, van der Schors RC, Hornshaw MP, Schoffelmier AN, et al. (2006) Intermittent administration of morphine alters protein expression in rat nucleus accumbens. *Proteomics* 6: 2003–2008.
14. Yang L, Sun ZS, Zhu YP (2007) Proteomic analysis of rat prefrontal cortex in three phases of morphine-induced conditioned place preference. *J Proteome Res* 6: 2239–2247.
15. Morón JA, Abul-Husn NS, Rozenfeld R, Dolios G, Wang R, et al. (2007) Morphine administration alters the profile of hippocampal postsynaptic density-associated proteins: a proteomics study focusing on endocytic proteins. *Mol Cell Proteomics* 6: 29–42.
16. Li Q, Zhao X, Zhong LJ, Yang HY, Wang Q, et al. (2009) Effects of chronic morphine treatment on protein expression in rat dorsal root ganglia. *Eur J Pharmacol* 612: 21–28.
17. Bodzon-Kulakowska A, Suder P, Mak P, Bierzynska-Krzysik A, Lubec G, et al. (2009) Proteomic analysis of striatal neuronal cell cultures after morphine administration. *J Sep Sci* 32: 1200–1210.
18. Suder P, Bodzon-Kulakowska A, Mak P, Bierzynska-Krzysik A, Daszykowski M, et al. (2009) The proteomic analysis of primary cortical astrocyte cell culture after morphine administration. *J Proteome Res* 8: 4633–4640.
19. Xu NJ, Yu YX, Zhu JM, Liu H, Shen L, et al. (2004) Inhibition of SNAP-25 phosphorylation at Ser187 is involved in chronic morphine-induced down-regulation of SNARE complex formation. *J Biol Chem* 279: 40601–40608.
20. Li H, Zhou Y, Kang L, Ma L (2006) Single and repeated morphine administrations differently regulate expression of N-ethylmaleimide-sensitive factor gene in the rat brain. *Neuroreport* 17: 71–74.
21. Berger SI, Posner JM, Ma'ayan A (2007) Genes2Networks: connecting lists of gene symbols using mammalian protein interactions databases. *BMC Bioinformatics* 8: 372.
22. Abul-Husn NS, Bushlin I, Moron JA, Jenkins SL, Dolios G, et al. (2009) Systems approach to explore components and interactions in the presynapse. *Proteomics* 9: 3303–3315.
23. Sharan R, Ulitsky I, Shamir R (2007) Network-based prediction of protein function. *Mol Syst Biol* 3: 88.
24. Trang T, Sutak M, Quirion R, Jhamandas K (2003) Spinal administration of lipoxygenase inhibitors suppresses behavioural and neurochemical manifestations of naloxone-precipitated opioid withdrawal. *Br J Pharmacol* 140: 295–304.
25. Kauer JA, Malenka RC (2007) Synaptic plasticity. *Nat Rev Neurosci* 8: 844–858.
26. Mouldous L, Neasta J, Uttenweiler-Joseph S, Stella A, Matondo M, et al. (2005) Long-term morphine treatment enhances proteasome-dependent degradation of G beta in human neuroblastoma SH-SY5Y cells: correlation with onset of adenylate cyclase sensitization. *Mol Pharmacol* 68: 467–476.
27. Chen S, Bawa D, Beshoh S, Gurd JW, Brown IR (2005) Association of heat shock proteins and neuronal membrane components with lipid rafts from the rat brain. *J Neurosci Res* 81: 522–529.
28. Chen S, Brown IR (2007) Translocation of constitutively expressed heat shock protein Hsc70 to synapse-enriched areas of the cerebral cortex after hyperthermic stress. *J Neurosci Res* 85: 402–409.
29. Mastrogiacomo A, Parsons SM, Zampighi GA, Jenden DJ, Umbach JA, et al. (1994) Cysteine string proteins: a potential link between synaptic vesicles and presynaptic Ca<sup>2+</sup> channels. *Science* 263: 981–982.
30. Braun JE, Wilbanks SM, Scheller RH (1996) The cysteine string secretory vesicle protein activates Hsc70 ATPase. *J Biol Chem* 271: 25989–25993.
31. Magga JM, Jarvis SE, Arnot MI, Zamponi GW, Braun JE (2000) Cysteine string protein regulates G protein modulation of N-type calcium channels. *Neuron* 28: 195–204.
32. Tobaben S, Thakur P, Fernandez-Chacon R, Sudhof TC, Rettig J, et al. (2001) A trimeric protein complex functions as a synaptic chaperone machine. *Neuron* 31: 987–999.
33. Sakisaka T, Meerlo T, Matteson J, Plutner H, Balch WE (2002) Rab- $\alpha$ GDI activity is regulated by a Hsp90 chaperone complex. *EMBO J* 21: 6125–6135.
34. Evans GJ, Morgan A, Burgoyne RD (2003) Tying everything together: the multiple roles of cysteine string protein (CSP) in regulated exocytosis. *Traffic* 4: 653–659.
35. Koshimizu TA, Tsuchiya H, Tsuda H, Fujiwara Y, Shibata K, et al. (2010) Inhibition of heat shock protein 90 attenuates adenylate cyclase sensitization after chronic morphine treatment. *Biochem Biophys Res Commun* 392: 603–607.
36. Gerges AZ, Tran IC, Backos DS, Harrell JM, Chinkers M, et al. (2004) Independent functions of hsp90 in neurotransmitter release and in the continuous synaptic cycling of AMPA receptors. *J Neurosci* 24: 4758–4766.
37. Ramos-Ortolaza DL, Bushlin I, Abul-Husn N, Annangudi SP, Sweedler J, et al. (2010) Quantitative neuroproteomics of the synapse. *Methods Mol Biol* 615: 227–46.
38. Brockmann A, Annangudi SP, Richmond TA, Ament SA, Xie F, et al. (2009) Quantitative peptidomics reveal brain peptide signatures of behavior. *Proc Natl Acad Sci U S A* 106: 2383–8.
39. Bader GD, Betel D, Hogue CW (2003) BIND: the Biomolecular Interaction Network Database. *Nucleic Acids Res* 31: 248–250.
40. Xenarios I, Rice DW, Salwinski L, Baron MK, Marcotte EM, et al. (2000) DIP: the database of interacting proteins. *Nucleic Acids Res* 28: 289–291.
41. Xenarios I, Fernandez E, Salwinski L, Duan XJ, Thompson MJ, et al. (2001) DIP: The Database of Interacting Proteins: 2001 update. *Nucleic Acids Res* 29: 239–241.
42. Mishra GR, Suresh M, Kumaran K, Kannabiran N, Suresh S, et al. (2006) Human protein reference database. *Nucleic Acids Res* 34: D411–414.
43. Hermjakob H, Montecchi-Palazzi L, Lewington C, Mudali S, Kerrien S, et al. (2004) IntAct: an open source molecular interaction database. *Nucleic Acids Res* 32: D452–455.
44. Ma'ayan A, Jenkins SL, Neves S, Hasseldine A, Grace E, et al. (2005) Formation of regulatory patterns during signal propagation in a Mammalian cellular network. *Science* 309: 1078–1083.
45. Zanzoni A, Montecchi-Palazzi L, Quondam M, Ausiello G, Helmer-Citterich M, et al. (2002) MINT: a Molecular INTeraction database. *FEBS Lett* 513: 135–140.
46. Stelzl U, Worm U, Lalowski M, Haenig C, Brembeck FH, et al. (2005) A human protein-protein interaction network: a resource for annotating the proteome. *Cell* 122: 957–968.
47. Rual JF, Venkatesan K, Hao T, Hirozane-Kishikawa T, Dricot A, et al. (2005) Towards a proteome-scale map of the human protein-protein interaction network. *Nature* 437: 1173–1178.
48. Beuming T, Skrabanek L, Niv MY, Mukherjee P, Weinstein H (2005) PDZBase: a protein-protein interaction database for PDZ-domains. *Bioinformatics* 21: 827–828.
49. Hermjakob H, Montecchi-Palazzi L, Bader G, Wojcik J, Salwinski L, et al. (2004) The HUPPO PSF's molecular interaction format—a community standard for the representation of protein interaction data. *Nat Biotechnol* 22: 177–183.
50. Ma'ayan A, Jenkins SL, Webb RL, Berger SI, Purushothaman SP, et al. (2009) SNAVI: Desktop application for analysis and visualization of large-scale signaling networks. *BMC Syst Biol* 3: 10.
51. Adamcsek B, Palla G, Farkas IJ, Derenyi I, Vicsek T (2006) CFinder: locating cliques and overlapping modules in biological networks. *Bioinformatics* 22: 1021–1023.
52. Derenyi I, Palla G, Vicsek T (2005) Clique percolation in random networks. *Phys Rev Lett* 94: 160202.
53. Gupta A, Mulder J, Gomes I, Rozenfeld R, Bushlin I, et al. (2010) Increased abundance of opioid receptor heteromers after chronic morphine administration. *Sci Signal* 3: ra54.
